# Supplementary material for: Decoding the transcriptomic signatures of psychological trauma in human cortex and amygdala
Source: bioRxiv preprint, doi:10.1101/2024.10.23.619681, version 1 (2024-10-23)

DEG enriched

DCM

## DLPFC modules

Childhood  
Only

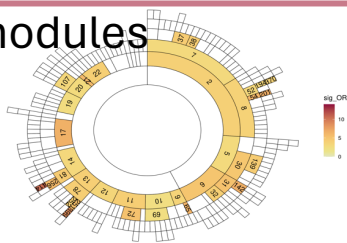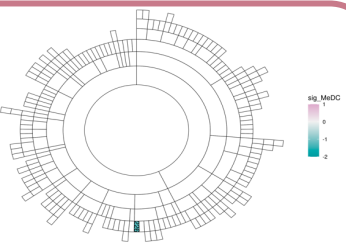

Adulthood  
Only

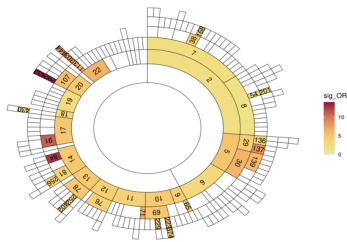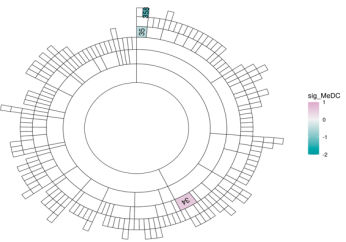

## dACC

Childhood  
Only

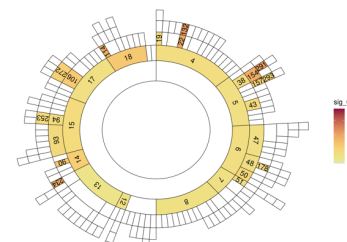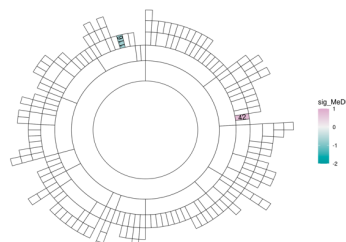

Adulthood  
Only

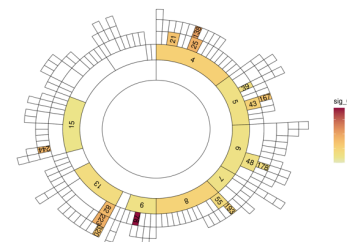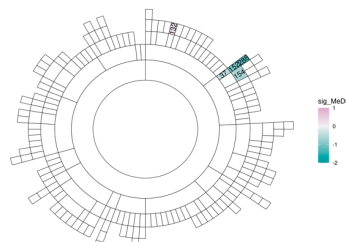

## MeA

Childhood  
Only

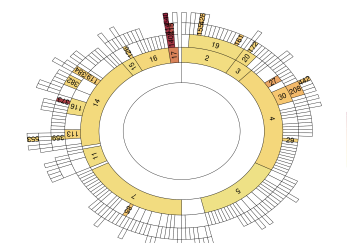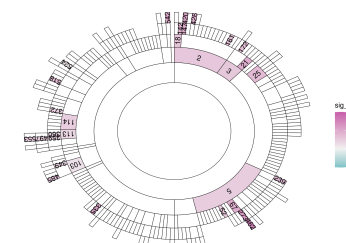

Adulthood  
Only

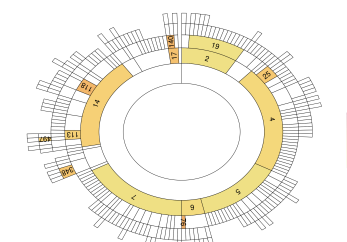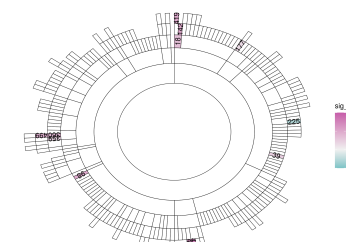

## BLA

Childhood  
Only

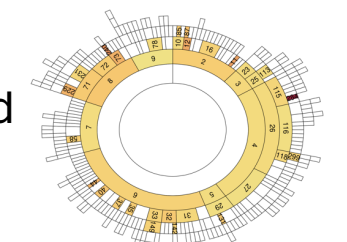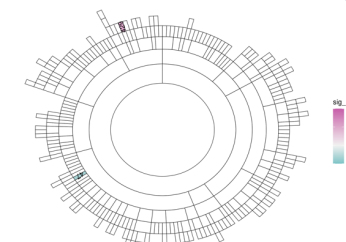

Adulthood  
Only

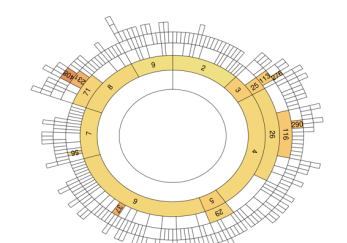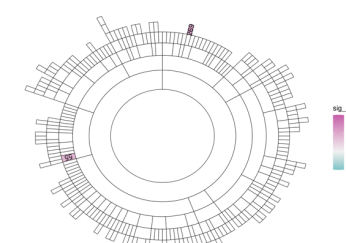

Supplement: SFig7 [file 619681_file16.pdf]
