# Supplementary material for: Decoding the transcriptomic signatures of psychological trauma in human cortex and amygdala
Source: PubMed Central journal article supplement — bioRxiv. 2024 Oct 23:2024.10.23.619681. Preprint. [Version 1] doi: 10.1101/2024.10.23.619681 (PMC11526900; doi:10.1101/2024.10.23.619681), 2024-10-23

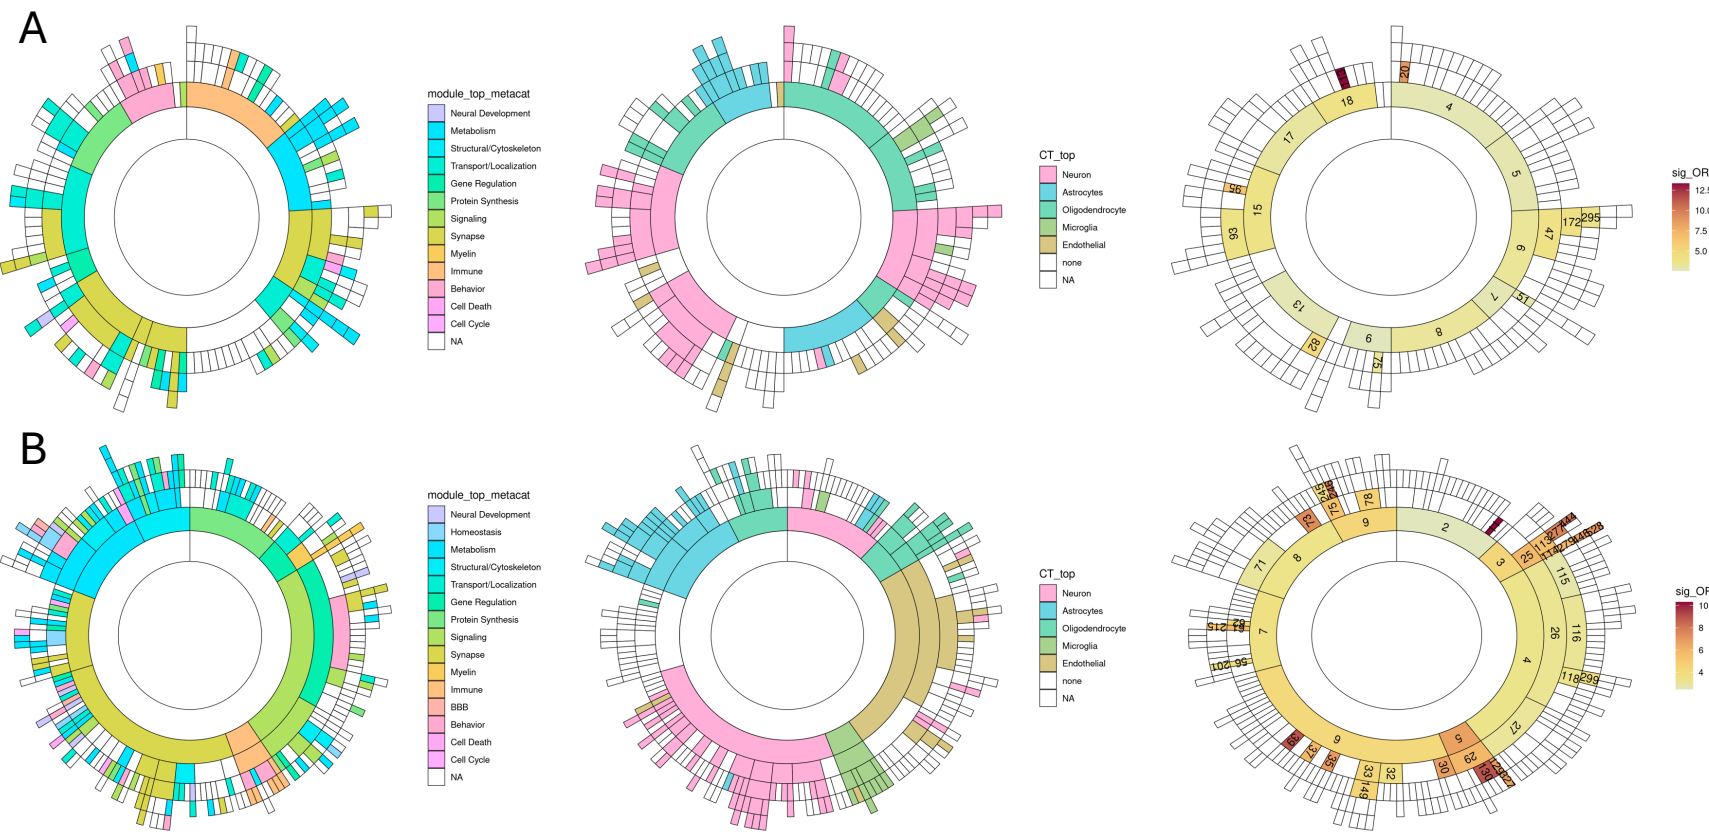

**C**

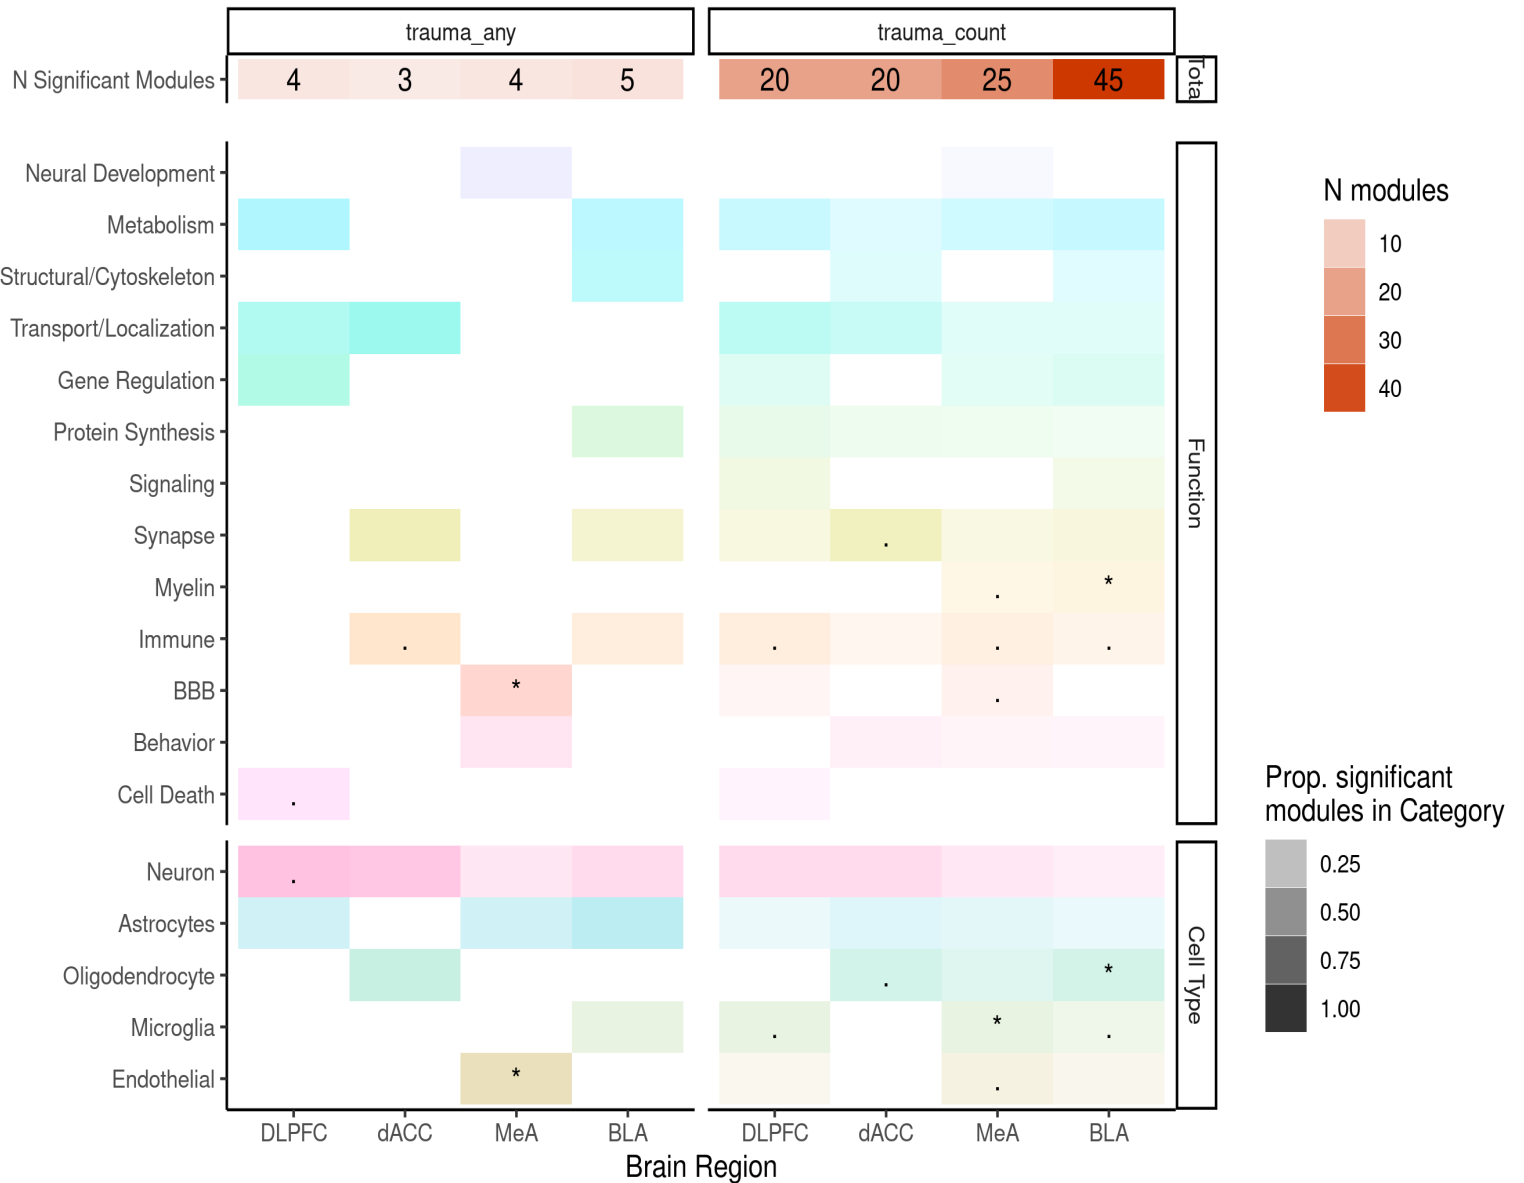

Supplement: media-5.pdf [file media-5.pdf]
