# Supplementary material for: Decoding the transcriptomic signatures of psychological trauma in human cortex and amygdala
Source: PubMed Central journal article supplement — bioRxiv. 2024 Oct 23:2024.10.23.619681. Preprint. [Version 1] doi: 10.1101/2024.10.23.619681 (PMC11526900; doi:10.1101/2024.10.23.619681), 2024-10-23

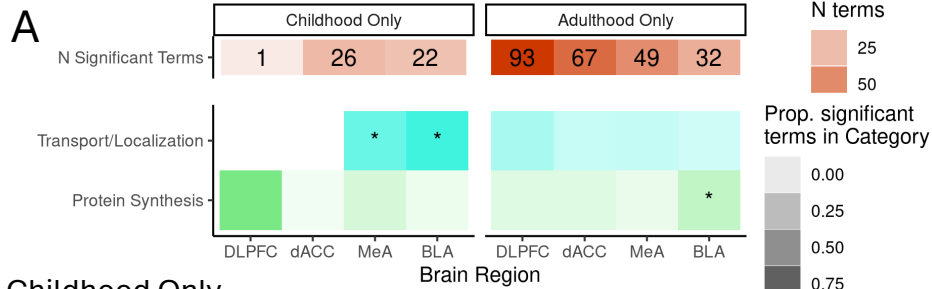

**Childhood Only**

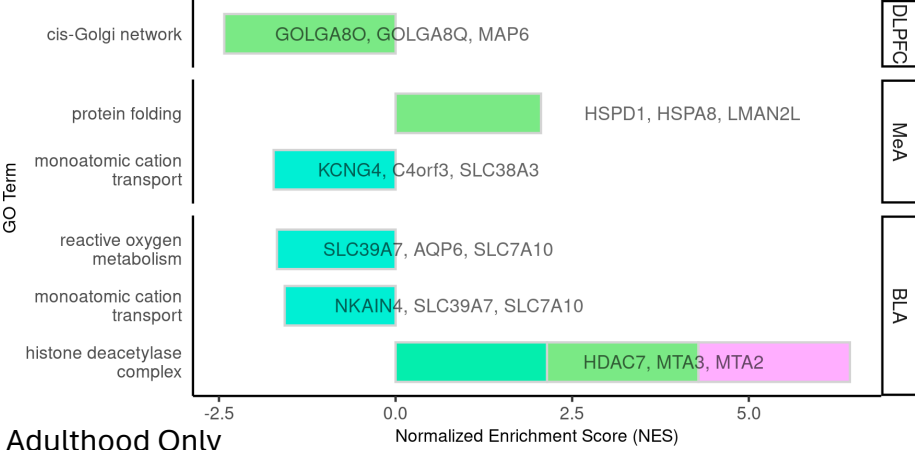

**Adulthood Only**

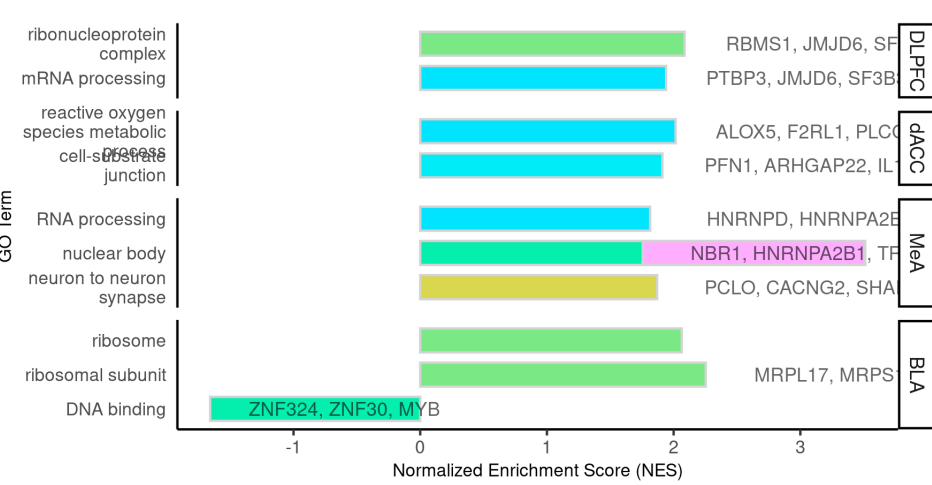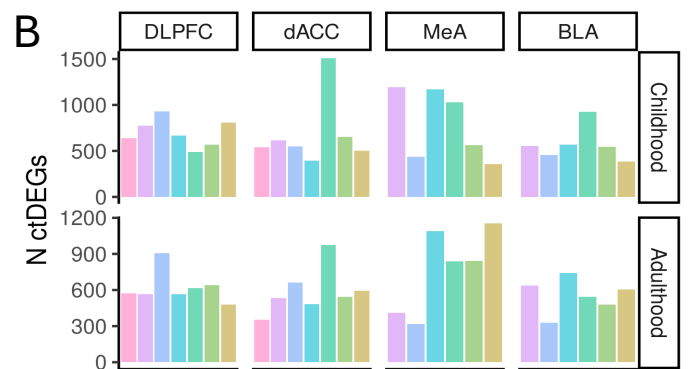

**CellType**

- Neurons
- Excitatory\_Neurons
- Inhibitory\_Neurons
- Astrocytes
- Oligodendrocytes
- Microglia
- Endothelial

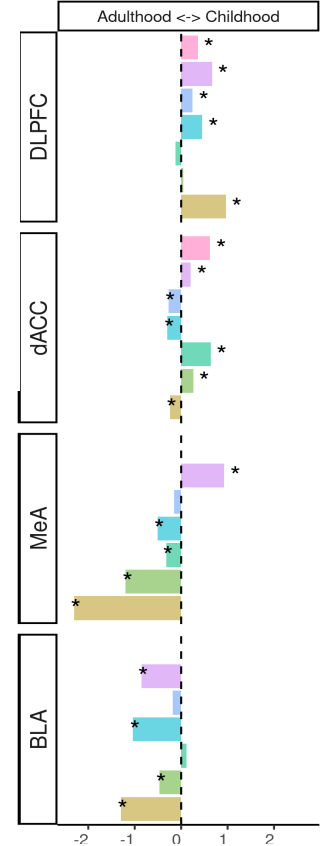

**C DEG enriched**

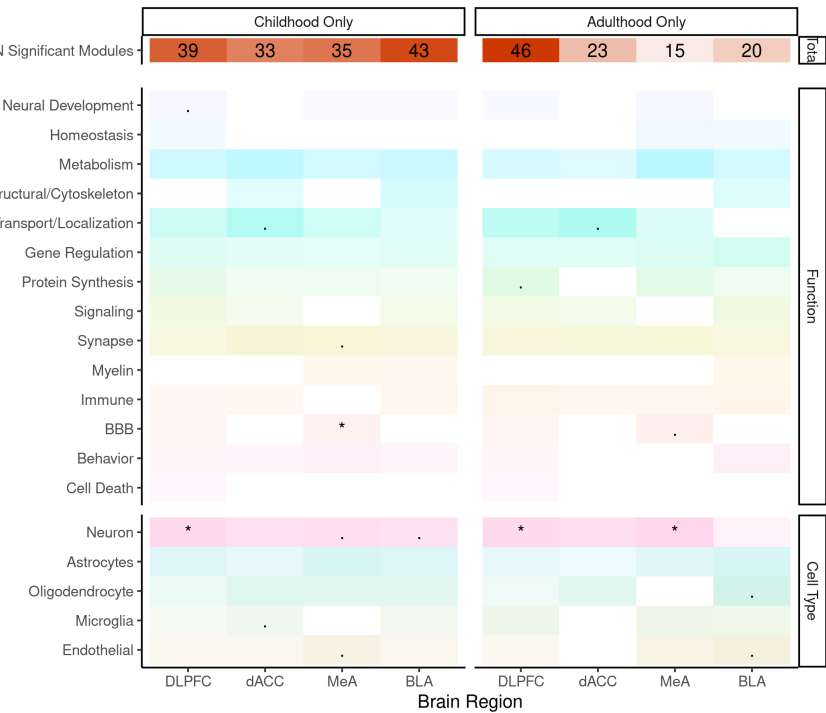

**D DCM**

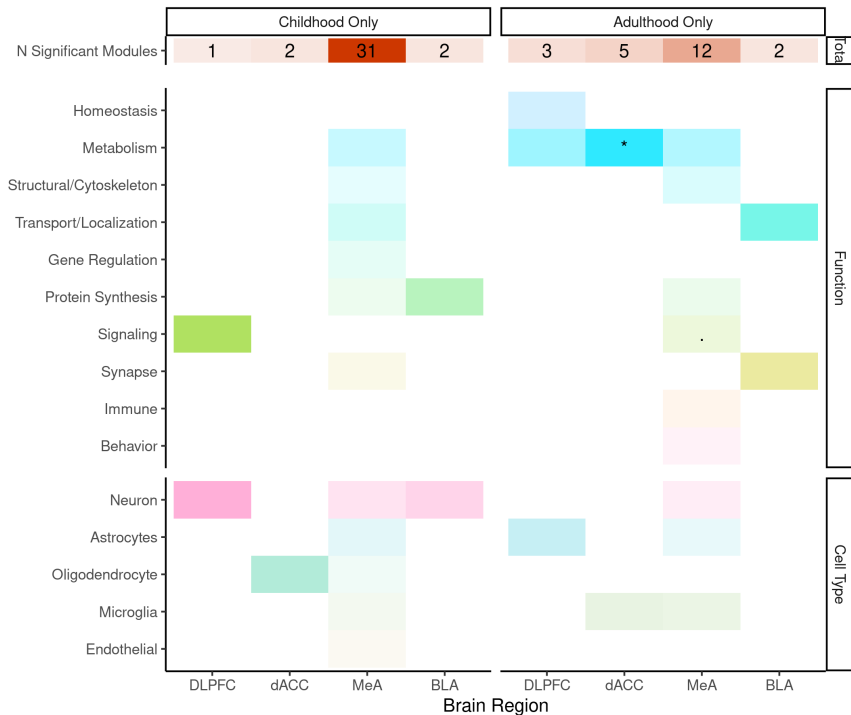

Supplement: media-6.pdf [file media-6.pdf]
